# Supplementary material for: Identification of Black Spot Resistance in Broccoli (Brassica oleracea L. var. italica) Germplasm Resources
Source: MDPI journal article supplement (doi:10.3390/app14072883), 2024-03-29
Supplement: s1 [file s1]

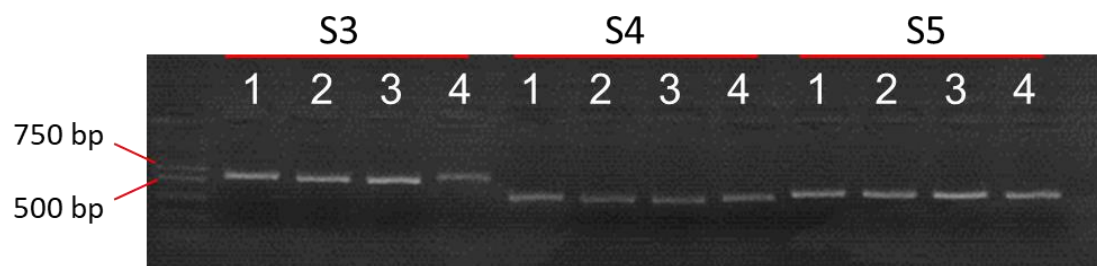

**Figure S1** PCR-analysis of *A. Alternata* and *X. campestris* using S3, S4, and S5. 1, 2, and 3 represent three kinds of *X. campestris*, 4 represents *A. Alternata*.
